# Supplementary material for: An Implementation of A Cycling Safety Education Program Among School Children Without Previous Formal Cycling Training: A Case Study in Serbia
Source: Research Square preprint supplement (doi:10.21203/rs.3.rs-113920/v1), 2020-12-07
Supplement: Supplementary file 1 [file 776249cc00795061dfcd5098.docx]

| Name and surname (identification no.): |  |
| --- | --- |

|  | | Grade | | | | |
| --- | --- | --- | --- | --- | --- | --- |
|  | Activity | 1 | 2 | 3 | 4 | 5 |
| 1. | Fitting the helmet | 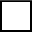 | 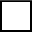 | 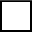 | 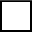 | 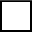 |
| 2. | Checking the helmet | 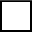 | 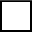 | 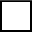 | 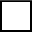 | 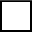 |
| 3. | Adjusting the bicycle | 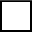 | 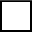 | 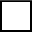 | 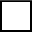 | 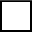 |
| 4. | Checking the bicycle | 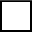 | 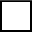 | 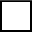 | 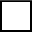 | 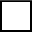 |
| 5. | Starting the movement | 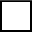 | 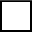 | 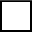 | 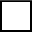 | 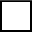 |
| 6. | Cycling in a straight line | 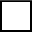 | 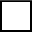 | 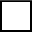 | 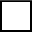 | 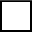 |
| 7. | Obeying the ‘STOP’ sign | 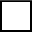 | 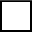 | 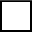 | 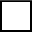 | 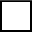 |
| 8. | Riding through intersections | 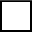 | 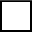 | 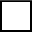 | 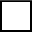 | 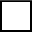 |
| 9. | Maneuvering to avoid obstacles | 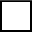 | 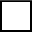 | 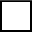 | 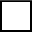 | 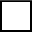 |
| 10. | Giving the signal for turning | 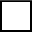 | 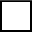 | 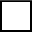 | 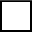 | 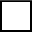 |
| 11. | Turning left | 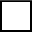 | 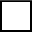 | 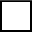 | 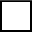 | 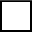 |
| 12. | Giving way to pedestrians | 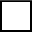 | 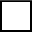 | 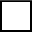 | 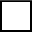 | 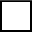 |
| 13. | Sudden braking and with control | 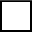 | 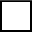 | 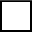 | 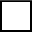 | 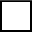 |
| 14. | Maneuvering around cones | 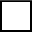 | 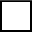 | 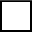 | 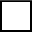 | 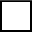 |
| 15. | Using a pedestrian crossing | 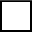 | 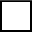 | 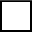 | 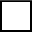 | 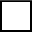 |
