# Supplementary material for: An Implementation of A Cycling Safety Education Program Among School Children Without Previous Formal Cycling Training: A Case Study in Serbia
Source: Research Square preprint supplement (doi:10.21203/rs.3.rs-113920/v1), 2020-12-07
Supplement: Supplementary file 2 [file a623c30f130ac04fa3b71511.docx]

|  |  | | Date: |  |
| --- | --- | --- | --- | --- |
|  |  | | School: |  |
| Name and surname: | |  | | |

| **1. Who can ride a bicycle on public roads?** | |
| --- | --- |
| 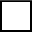 | A child that is six years old. |
| 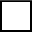 | Anyone who knows how to ride a bicycle. |
| 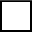 | A child that is twelve years old. |
| 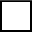 | A child with a schoolmate. |

| **2. Mark a picture showing a cyclist who safely rides a bicycle.** | | | |
| --- | --- | --- | --- |
| 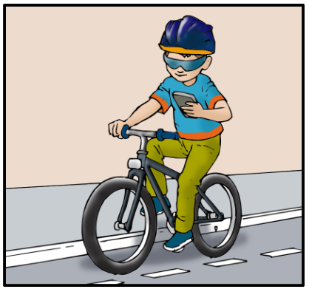 | 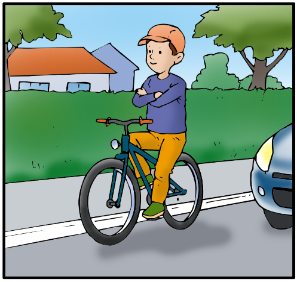 | 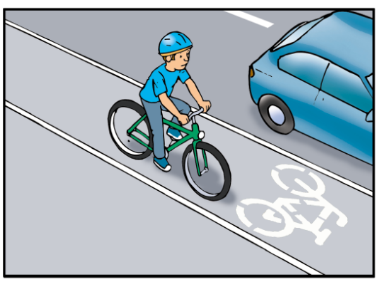 | 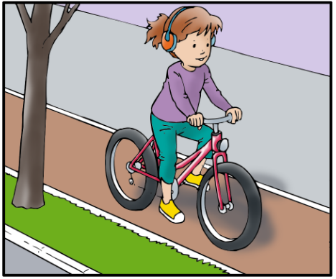 |
| 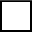 | 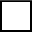 | 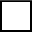 | 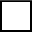 |

| **3. Mark images showing bicycle parts and equipment that your bike must have.** | | | |
| --- | --- | --- | --- |
| 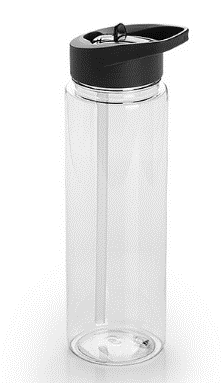 | 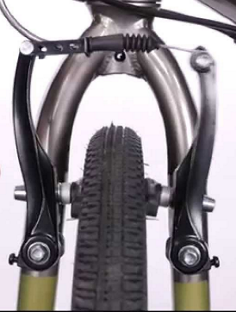 | 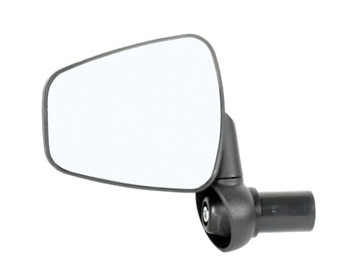 | 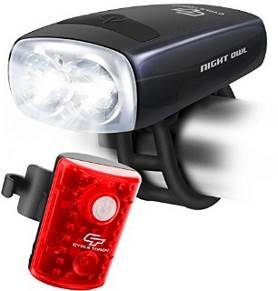 |
| Water bottle | Brakes | Mirror | Front and rear lights |
| 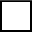 | 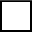 | 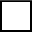 | 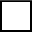 |

| **4. What must your bike have when you ride it at night and under conditions of reduced visibility?** | |
| --- | --- |
| 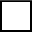 | Turn on a white light at the front and a red light at the rear. |
| 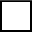 | A bell to warn pedestrians. |
| 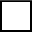 | Bike locks. |

| **5. Mark images showing the equipment that cyclists should have.** | | | |
| --- | --- | --- | --- |
| 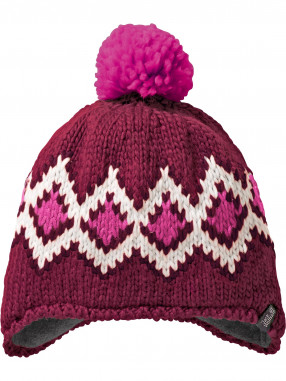 | 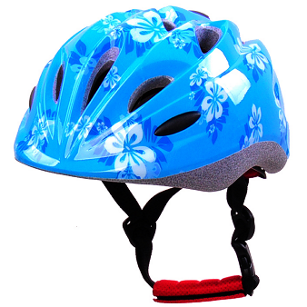 | 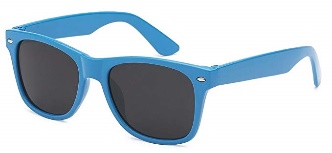 | 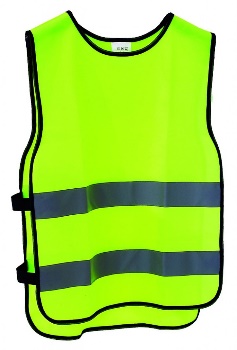 |
| Winter hat | Helmet | Sunglasses | Reflective vest |
| 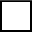 | 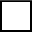 | 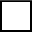 | 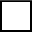 |

| **6. Why should a cyclist wear a safety helmet?** | |
| --- | --- |
| 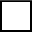 | It is required by law. |
| 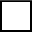 | To protect the brain from injury. |
| 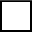 | Because parents said so. |
| 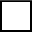 | Because it looks so beautiful. |

| **7. Mark an image where a cyclist wears his helmet correctly.** | | | |
| --- | --- | --- | --- |
| 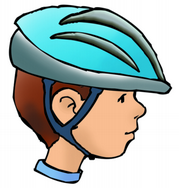 | 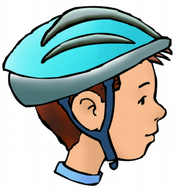 | 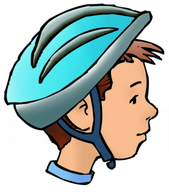 | 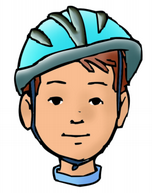 |
| 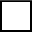 | 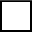 | 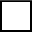 | 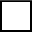 |

| **8. What does the sign shown in the picture at the intersection mean?** | | | | | | | 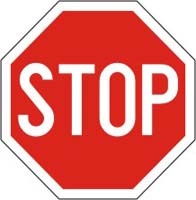 | |
| --- | --- | --- | --- | --- | --- | --- | --- | --- |
|  | 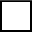 | | Continue to move, the sign is just related to cars. | | | |
|  | 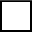 | | Mandatory sign to stop. | | | |
|  | 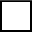 | | Ban cyclists from road. | | | |
|  | 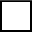 | | I am not sure. | | | |
| **9. What does each signal on traffic lights mean?** | | | | | | | | | |
| 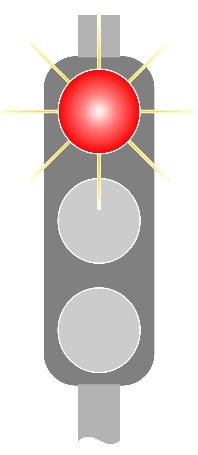 | | | | 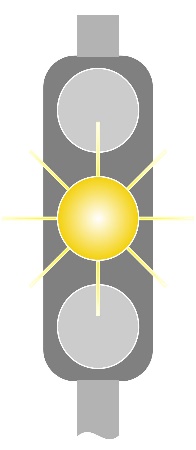 | | 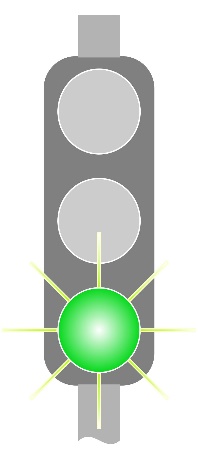 | | | |
| 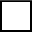 | | Prohibition of passage. | | 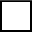 | Prohibition of passage. | 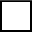 | | Prohibition of passage. | |
| 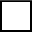 | | Deceleration, prohibition of passage, stop if it is safe to do so. | | 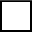 | Deceleration, prohibition of passage, stop if it is safe to do so. | 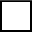 | | Deceleration, prohibition of passage, stop if it is safe to do so. | |
| 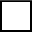 | | Permission of passage. | | 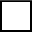 | Permission of passage. | 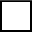 | | Permission of passage. | |
| 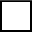 | | I am not sure. | | 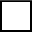 | I am not sure. | 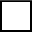 | | I am not sure. | |

| **10. What does each signal on traffic lights mean?** | | | | | | | |
| --- | --- | --- | --- | --- | --- | --- | --- |
| 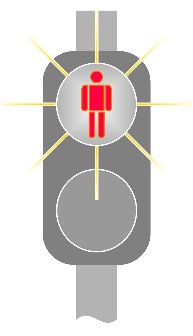 | | 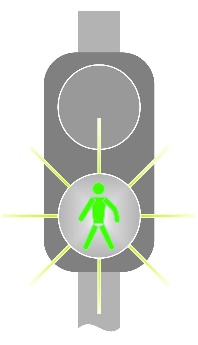 | | 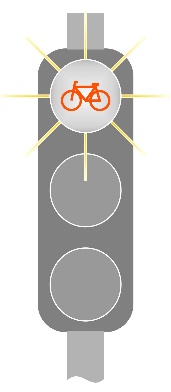 | | 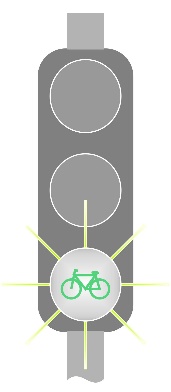 | |
| 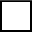 | Permission of passage for pedestrians. | 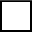 | Permission of passage for pedestrians. | 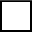 | Permission of passage for pedestrians. | 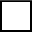 | Permission of passage for pedestrians. |
| 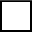 | Permission of passage for cyclists. | 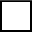 | Permission of passage for cyclists. | 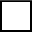 | Permission of passage for cyclists. | 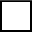 | Permission of passage for cyclists. |
| 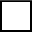 | Prohibition of passage for pedestrians. | 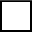 | Prohibition of passage for pedestrians. | 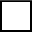 | Prohibition of passage for pedestrians. | 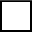 | Prohibition of passage for pedestrians. |
| 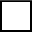 | Prohibition of passage for cyclists. | 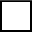 | Prohibition of passage for cyclists. | 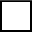 | Prohibition of passage for cyclists. | 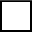 | Prohibition of passage for cyclists. |

| **11. What does the sign shown in the picture at the intersection mean?** | | | 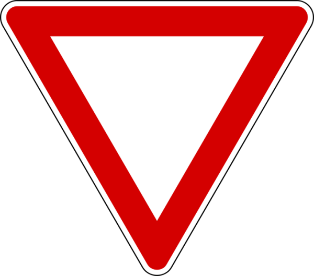 |
| --- | --- | --- | --- |
|  | 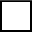 | Prohibition of passage for cyclists. |
|  | 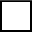 | Mandatory sign to stop. |
|  | 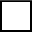 | Continue to move, but give way to vehicles on the main road. |
|  | 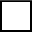 | I am not sure. |

| **12. Mark what do the following road signs mean?** | | | | | | | |
| --- | --- | --- | --- | --- | --- | --- | --- |
| 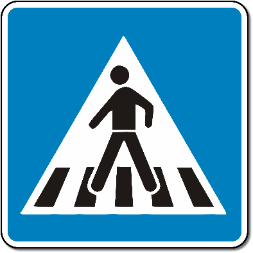 | | *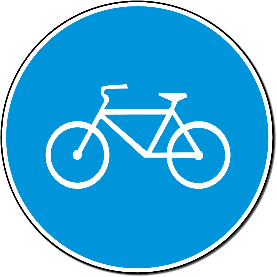* | | 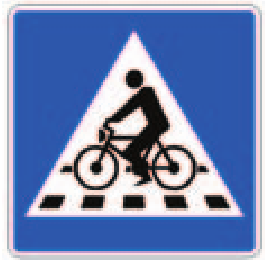 | | 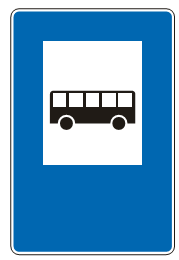 | |
| 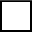 | Pedestrain crossing | 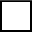 | Pedestrain crossing | 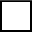 | Pedestrain crossing | 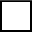 | Pedestrain crossing |
| 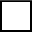 | Cyclist lane | 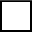 | Cyclist lane | 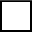 | Cyclist lane | 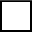 | Cyclist lane |
|  | Cycle lane crosses the road |  | Cycle lane crosses the road |  | Cycle lane crosses the road |  | Cycle lane crosses the road |
|  | Bus stop |  | Bus stop |  | Bus stop |  | Bus stop |

| **13. When a cyclist ride a bike, what do the signals mean?** | | | | | | | |
| --- | --- | --- | --- | --- | --- | --- | --- |
|  | | |  | | |  | |
|  | | Stop |  | Stop | |  | Stop |
|  | | Turn left |  | Turn left | |  | Turn left |
|  | | Turn right |  | Turn right | |  | Turn right |
|  | | I am not sure. |  | I am not sure. | |  | I am not sure. |
| **14. Does a cyclist move properly in the situation shown in the picture?** | | | | |  | | |
|  |  | Yes, because he/she moves along the bicycle lane | | |
|  |  | No, because he/she ride a bike along the road where there is a bicycle lane. | | |
|  |  | Yes, because he/she moves in the middle of road. | | |
|  |  | I am not sure. | | |

| **15. Who has priority at the intersection to move on in the picture?** | | |  |
| --- | --- | --- | --- |
|  |  | Car. |
|  |  | Cyclist. |
|  |  | I am not sure. |
|  |  |  |  |
| **16. Who has priority at the intersection to move on in the picture?** | | |  |
|  |  | Car. |
|  |  | Cyclist. |
|  |  | I am not sure. |

| **17. Does a cyclist move properly in the situation shown in the picture?** | | |  |
| --- | --- | --- | --- |
|  |  | Yes, because the vehicle is turning right, and a cyclist has priority to move. |
|  |  | No, because a cyclist does not get off his/her bike and walk accross the crossing lane. |
|  |  | No, because a car is coming from the right. |
|  |  | I am not sure. |

**THANK YOU FOR TAKING YOUR TIME TO DO THIS TEST!**
