# Supplementary material for: An Implementation of A Cycling Safety Education Program Among School Children Without Previous Formal Cycling Training: A Case Study in Serbia
Source: Research Square preprint supplement (doi:10.21203/rs.3.rs-113920/v1), 2020-12-07
Supplement: Supplementary file 3 [file adabe4a768558fdd2b0cf30c.docx]

Table S1. Examples of theoretical and practical activities

| Examples of theoretical activities | Unit 2. Importance of helmet use for cyclists  *The teacher prepares the area for demonstration exercise in advance. This activity includes throwing an egg onto different base types, i.e. soft and hard. It is necessary to prepare a plastic container (for example a bucket, a basin, or something similar) and fill it with pieces of styrofoam or similar soft material. There should be about 15 cm of material in the container. Besides that, in the same or different container, place a hard material, such as brick, rock and similar, that can as accurately as possible describe the road surface (road, sidewalk, bicycle lane, etc.).* |
| --- | --- |
| Examples of practical activities | Unit 5. Maneuvering skills  *The teacher explains to the children that cyclists, while riding, can encounter a road obstacle, which they need to maneuver. Further, they explain that this can be done, if they previously confirm that it can be done safely, by looking back over their left shoulder. If the cyclist is sure there is no danger, then they should maneuver to avoid the obstacle, moving by the right edge of the lane they moved to. If there are several obstacles on the lane they are moving along, the cyclist should not 'zig-zag', but continue their movement uniformly, until they pass by the last obstacle. The teacher places an obstacle on the right lane of the path, so that it takes up the whole width of the lane. A child takes a helmet from a volunteer and adjusts it, then puts it on their head and takes the starting position on the lane. After that, they slowly start moving towards the obstacle. When they arrive close to it, they look back over their left shoulder, then signal with their left hand that they are maneuvering to avoid the obstacle, pass it by and return to the right lane. Then the teacher places three obstacles, at a short distance from one another. The child will repeat the same action, they will not 'zigzag' between the obstacles, but they will uniformly pass by all three obstacles. The child can repeat this exercise twice.* |
